# Supplementary material
Source: PubMed Central journal article supplement (PMC5192099)
Supplement: AAC.01381-16_zac001175789s1.pdf [file AAC.01381-16_zac001175789s1.pdf]

## SUPPLEMENTAL MATERIAL

**Supplemental Table S1** Summary of animal infection model studies for evaluation of  $T_{f>MIC}$

| Infection model                           | Strain                                    | MIC ( $\mu\text{g/mL}$ ) | $T_{f>MIC}$            |                                                                    | Reference |
|-------------------------------------------|-------------------------------------------|--------------------------|------------------------|--------------------------------------------------------------------|-----------|
|                                           |                                           |                          | Static effect          | 1 log reduction                                                    |           |
| Murine thigh infection model <sup>a</sup> | <i>P. aeruginosa</i> SR27016 <sup>b</sup> | 0.25 <sup>c</sup>        | 53.4% <sup>d,e,f</sup> | 63.3% <sup>d,e,f</sup><br>74.2% (2 log reduction) <sup>d,e,f</sup> | 1         |
| Murine lung infection model <sup>g</sup>  | <i>P. aeruginosa</i> strains <sup>h</sup> | 0.5 to 8 <sup>k</sup>    | 43.5% <sup>d,f,l</sup> | 68.5% <sup>d,f,l</sup>                                             | 2         |
|                                           | <i>A. baumannii</i> strains <sup>i</sup>  | 0.125 to 2 <sup>k</sup>  | 68.6% <sup>d,f,l</sup> | 76.2% <sup>d,f,l</sup>                                             |           |
|                                           | <i>K. pneumoniae</i> strains <sup>j</sup> | 0.063 to 16 <sup>k</sup> | 59.1% <sup>d,f,l</sup> | 77.9% <sup>d,f,l</sup>                                             |           |
| Murine thigh infection model <sup>a</sup> | <i>P. aeruginosa</i> SR27001 <sup>m</sup> | 8 <sup>k</sup>           | 41.7% <sup>d,f,l</sup> | 54.2% <sup>d,f,l</sup>                                             | 3         |
|                                           | <i>K. pneumoniae</i> strains <sup>n</sup> | 0.125 to 16 <sup>k</sup> | 71.0% <sup>d,f,l</sup> | 80.0% <sup>d,f,l</sup>                                             |           |
|                                           | <i>E. coli</i> strains <sup>o</sup>       | 0.125 to 2 <sup>k</sup>  | 44.7% <sup>d,f,l</sup> | 54.0% <sup>d,f,l</sup>                                             |           |

<sup>a</sup> The male mice (5-week-old, Jcl: ICR mouse) were rendered neutropenic by intraperitoneal infection of cyclophosphamide with 150 and 100 mg/kg at 4 and 1 days before infection, respectively. Anesthetized mice were infected by intramuscular injection of bacterial suspension into thigh (n=3 to 5). Inoculation volume was 0.1 mL per site ( $10^5$  to  $10^6$  CFU/mouse).

<sup>b</sup> A cephem susceptible strain. <sup>c</sup> MIC was measured using CAMHB supplemented with 20  $\mu\text{M}$  of apo-transferrin, i.e., iron deficient medium.

<sup>d</sup> Single-dose serum PK studies were performed in the murine infection models. The dosing solution was subcutaneously administered to mice at 2 hours after infection. Plasma concentrations of cefiderocol were determined by LC/MS/MS.

<sup>e</sup> In the PD studies, the administration of cefiderocol was initiated at 2 hours after infection. The total daily dose of cefiderocol was given as one dose in 24 hours, two equally divided doses every 12 hours, four equally divided doses every 6 hours, and eight equally divided doses every 3 hours, respectively. The vehicle control groups were given 0.9% saline.

<sup>f</sup> In the PD studies, mice were dissected to take out tissue at 26 hours after infection. The samples were homogenized with MHB and the homogenates were serially diluted and incorporated into Drigalski improved medium. The plates were incubated at 37°C for 20 to 72 hours and the number of colonies was counted.

<sup>g</sup> The male mice (5-week-old, Jcl: ICR mouse) were rendered neutropenic by intraperitoneal infection of cyclophosphamide with 150 and 100 mg/kg at 4

and 1 days before infection, respectively. Anesthetized mice were infected by intranasal instillation of bacterial suspension into thigh (n=3 to 5). Inoculation volume was 0.07 mL per site ( $10^5$  to  $10^6$  CFU/mouse). For *A. baumannii* and carbapenem resistant *K. pneumoniae*, the inoculum was prepared with 5% gastric mucin to the desired concentration (bacteria:mucin=1:9).

<sup>h</sup> Four strains including multidrug-resistant (MDR) *P. aeruginosa* (MDRP). <sup>i</sup> Six strains including MDR *A. baumannii*.

<sup>j</sup> Three carbapenem resistant strains producing NDM-1, KPC-2 or OXA-48.

<sup>k</sup> MIC was measured using Chelex-treated Iso-sensitest broth (ISB), i.e., iron deficient medium. One hundred grams of Chelex was added to 1 L of autoclaved medium and stirred at 4 °C for over-night. The incubated medium was filtered with 0.2 µm filter, and pH was adjusted to 7.2 to 7.4. The filtered medium was supplemented with 20 to 25 mg/L CaCl<sub>2</sub>, 10.0 to 12.5 mg/L MgCl<sub>2</sub> and 10 µM ZnSO<sub>4</sub>.

<sup>l</sup> In the PD studies, the administration of cefiderocol was initiated at 2 hours after infection and repeated at regular intervals of every 3 hours subcutaneously.

<sup>m</sup> A strain of MDRP. <sup>n</sup> Nine strains producing NDM or KPC including ESBL producer and carbapenem resistant strains. <sup>o</sup> Two strains.

**Supplemental Table S2** Summary of clinical study designs

| Study                                     | Dose regimen                                                                                                                                               | Subjects                                                                                                                                                 | PK sampling                                                                                                                                                                                                                                                                                                                                                                                                                                                                                                                                                |
|-------------------------------------------|------------------------------------------------------------------------------------------------------------------------------------------------------------|----------------------------------------------------------------------------------------------------------------------------------------------------------|------------------------------------------------------------------------------------------------------------------------------------------------------------------------------------------------------------------------------------------------------------------------------------------------------------------------------------------------------------------------------------------------------------------------------------------------------------------------------------------------------------------------------------------------------------|
| Single- and multiple-ascending dose study | Single dose: 100, 250, 500, 1000 and 2000 mg single infusion over 1 hour                                                                                   | 8 subjects per dose group (active 6, placebo 2)                                                                                                          | Plasma: pre-dose, 0.5, 1, 1.25, 1.5, 2, 2.5, 3, 3.5, 4, 4.5, 5, 6, 8, 10, 12, 16, 24, 36 and 48 hours from the start of the infusion<br>Urine: 0-2, 2-4, 4-6, 6-8, 8-12, 12-24 and 24-48 hours from the start of the infusion                                                                                                                                                                                                                                                                                                                              |
|                                           | Multiple dose: 1000 and 2000 mg infusion over 1 hour for 10 days (consist of single dose on Day 1 and Day 10, and q8h from Day 2 to Day 9, total 26 times) | 10 subjects per dose group (active 8, placebo 2)                                                                                                         | Plasma:<br>Day 1 (morning dose: first dose): pre-dose, 0.5, 1, 1.25, 1.5, 2, 2.5, 3, 3.5, 4, 4.5, 5, 6, 8, 10, 12 and 16 hours<br>Days 2, 3, 5, 8 and 9 (each morning dose): pre-dose<br>Day 10 (morning dose: last dose): pre-dose, 0.5, 1, 1.25, 1.5, 2, 2.5, 3, 3.5, 4, 4.5, 5, 6, 8, 10, 12, 16, 24, 36 and 48 hours from the start of the infusion<br>Urine:<br>Day 1 (morning dose: first dose): 0-8 and 8-24 hours from the start of the first infusion<br>Day 10 (morning dose: last dose): 0-8 and 8-24 hours from the start of the last infusion |
| Renal impairment study                    | 1000 mg single infusion over 1 hour                                                                                                                        | Cohorts 1 to 5 (normal/mild/moderate/severe/ESRD requiring hemodialysis):<br>8 subjects per cohort (6 subjects in severe, 8 subjects in other 4 cohorts) | Plasma: pre-dose, 0.25, 0.5, 1, 1.5, 2, 3, 4, 5, 6, 8, 12, 16, 24, 36, 48 and 72 hours from the start of the infusion<br>Dialysate: 2-3, 3-4, 4-5, 5-6 from the start of the infusion (nominally, 4-hr hemodialysis started at 2 hours after the start of the infusion)                                                                                                                                                                                                                                                                                    |

The summary was based on the protocol for the clinical studies presented in the references (4, 5).

ESRD: end stage of renal disease.

**Supplemental Table S3** Summary of PK parameters in clinical studies

(a) Single- and multiple-ascending dose study

| PK parameter                                        | Single dose group |                 |                 |                  |                  |
|-----------------------------------------------------|-------------------|-----------------|-----------------|------------------|------------------|
|                                                     | 100 mg<br>(N=6)   | 250 mg<br>(N=6) | 500 mg<br>(N=6) | 1000 mg<br>(N=6) | 2000 mg<br>(N=8) |
| $C_{max}$<br>( $\mu\text{g/mL}$ )                   | 7.76<br>(7.8)     | 18.9<br>(4.9)   | 46.6<br>(10.7)  | 76.4<br>(4.6)    | 156<br>(7.9)     |
| $AUC_{0-inf}$<br>( $\mu\text{g}\cdot\text{hr/mL}$ ) | 17.49<br>(8.5)    | 41.94<br>(6.3)  | 108.6<br>(22.7) | 168.1<br>(7.0)   | 389.7<br>(9.0)   |
| $t_{1/2}$<br>(hr)                                   | 2.00<br>(4.4)     | 1.98<br>(5.5)   | 2.12<br>(15.5)  | 2.26<br>(5.8)    | 2.74<br>(10.2)   |
| CL<br>(L/hr)                                        | 5.72<br>(8.5)     | 5.96<br>(6.3)   | 4.60<br>(22.7)  | 5.95<br>(7.0)    | 5.13<br>(9.0)    |
| $f_e$<br>(%)                                        | 68.4<br>(3.2)     | 64.0<br>(5.4)   | 65.8<br>(16.2)  | 68.3<br>(6.0)    | 61.5<br>(10.6)   |

| PK parameter                                  | Multiple dose group |                 |                            |                 |                 |                 |
|-----------------------------------------------|---------------------|-----------------|----------------------------|-----------------|-----------------|-----------------|
|                                               | 1000 mg             |                 | 1000 mg (2 <sup>nd</sup> ) |                 | 2000 mg         |                 |
| N                                             | 8                   | 8               | 8                          | 7 <sup>a</sup>  | 8               | 8               |
| Day                                           | 1                   | 10              | 1                          | 10              | 1               | 10              |
| $C_{max}$<br>( $\mu\text{g/mL}$ )             | 72.2<br>(12.0)      | 69.8<br>(13.3)  | 68.1<br>(16.2)             | 72.2<br>(11.5)  | 141<br>(22.7)   | 153<br>(12.9)   |
| $AUC^b$<br>( $\mu\text{g}\cdot\text{hr/mL}$ ) | 177.4<br>(10.9)     | 160.5<br>(13.5) | 172.0<br>(10.6)            | 168.6<br>(11.0) | 338.5<br>(15.5) | 366.5<br>(14.0) |
| $t_{1/2}$<br>(hr)                             | 2.37<br>(11.4)      | 2.35<br>(18.5)  | 2.25<br>(8.8)              | 2.19<br>(4.3)   | 2.40<br>(13.2)  | 2.72<br>(21.6)  |
| CL<br>(L/hr)                                  | 5.64<br>(10.9)      | 6.23<br>(13.5)  | 5.81<br>(10.6)             | 5.93<br>(11.0)  | 5.91<br>(15.5)  | 5.46<br>(14.0)  |
| $f_e$<br>(%)                                  | 70.9<br>(6.7)       | 70.0<br>(6.1)   | 63.8<br>(12.3)             | 64.7<br>(12.8)  | 67.7<br>(4.7)   | 71.4<br>(5.3)   |

The summary was based on the results of clinical studies presented in the reference (4).

Geometric mean (CV% Geometric Mean).

$C_{max}$ : maximum plasma concentration.  $AUC_{0-inf}$ : area under the plasma concentration-time curve from time zero to infinity.  $t_{1/2}$ : terminal half-life. CL: total clearance.  $f_e$ : fraction of dose excreted unchanged into urine.

<sup>a</sup> N=6 for  $f_e$ .

<sup>b</sup>  $AUC_{0-inf}$  for Day1 and AUC over the dosing interval for Day 10.

**Supplemental Table S3 (continued)**

(b) Renal impairment study

| PK parameter                                     | Renal function group |              |                |              |                     |                      |
|--------------------------------------------------|----------------------|--------------|----------------|--------------|---------------------|----------------------|
|                                                  | Normal (N=8)         | Mild (N=8)   | Moderate (N=7) | Severe (N=6) | ESRD (w/o HD) (N=8) | ESRD (with HD) (N=8) |
| $C_{max}$ ( $\mu\text{g/mL}$ )                   | 81.0 (27.4)          | 73.4 (21.3)  | 78.0 (31.1)    | 80.1 (19.8)  | 93.0 (27.8)         | 75.4 (31.1)          |
| $AUC_{0-inf}$ ( $\mu\text{g}\cdot\text{hr/mL}$ ) | 213.4 (26.5)         | 218.7 (22.2) | 312.3 (38.4)   | 543.2 (23.6) | 880.7 (24.2)        | 318.1 (20.3)         |
| $t_{1/2}$ (hr)                                   | 2.82 (16.5)          | 2.98 (8.4)   | 4.13 (12.6)    | 6.91 (30.6)  | 9.60 (33.4)         | 9.45 (32.8)          |
| CL (L/hr)                                        | 4.69 (26.5)          | 4.57 (22.2)  | 3.20 (38.4)    | 1.84 (23.6)  | 1.14 (24.2)         | 3.14 (20.3)          |
| $V_{ss}$ (L)                                     | 13.5 (30.2)          | 14.8 (17.7)  | 15.4 (28.7)    | 16.4 (23.4)  | 14.2 (22.5)         | 26.6 (33.5)          |
| Fu                                               | 0.420 (12.7)         | 0.372 (43.5) | 0.353 (38.9)   | 0.360 (31.4) | 0.424 (26.6)        | 0.466 (19.8)         |

The summary was based on the results of clinical studies presented in the reference (5).

Geometric mean (CV% Geometric Mean).

ESRD: end stage renal disease. w/o HD: without hemodialysis (dosing post hemodialysis). with HD: dosing prior hemodialysis.  $C_{max}$ : maximum plasma concentration.  $AUC_{0-inf}$ : area under the plasma concentration-time curve from time zero to infinity.  $t_{1/2}$ : terminal half-life. CL: total clearance.  $V_{ss}$ : volume of distribution at steady state. Fu: fraction of drug unbound in plasma.

**Supplemental Table S4** Model development process

| Model No.                                            | Model description                                                                                              | OBJ      | -2l.l.d. | N <sub>parm</sub> | Reference model |
|------------------------------------------------------|----------------------------------------------------------------------------------------------------------------|----------|----------|-------------------|-----------------|
| <b>HV model</b>                                      |                                                                                                                |          |          |                   |                 |
| 1                                                    | 3-comp model with urine output compartment, combination residual error, and IIV for CL, V1, Q2, V2, Q3, and V3 | 4688.084 | ---      | 17                | ---             |
| 2                                                    | 2-comp model with urine output compartment, combination residual error, and IIV for CL, V1, Q, and V2          | 4768.308 | 80.224   | 13                | 1               |
| 3                                                    | Model #1 without IIV for Q3 and V3                                                                             | 4689.062 | 0.978    | 15                | 1               |
| 4                                                    | Model #3 with proportional residual error                                                                      | 4691.928 | 2.866    | 13                | 3               |
| 5                                                    | Model #4 without IIV for Q2 (HV model)                                                                         | 4691.928 | 0.000    | 12                | 4               |
| <b>Covariate model using MDRD-eGFR</b>               |                                                                                                                |          |          |                   |                 |
| 6                                                    | 3-comp model without urine output compartment and with proportional residual error, and IIV for CL, V1, and V2 | 3873.678 | ---      | 10                | ---             |
| 7                                                    | Using linear model for effect of MDRD-eGFR on CL                                                               | 3684.213 | -189.465 | 11                | 6               |
| 8                                                    | Using piece-wise linear model for effect of MDRD-eGFR on CL                                                    | 3668.895 | -204.783 | 12                | 6               |
| 9                                                    | Using power model for effect of MDRD-eGFR on CL                                                                | 3673.004 | -200.674 | 11                | 6               |
| 10                                                   | Using piece-wise linear model with constant for MDRD-eGFR $\geq 100$ mL/min/1.73 m <sup>2</sup>                | 3669.007 | -204.671 | 11                | 6               |
| 11                                                   | Using power model for effects of body weight on V1 and V2 (final MDRD-eGFR model)                              | 3581.534 | -87.473  | 13                | 10              |
| <b>Incorporation of CG-CrCL instead of MDRD-eGFR</b> |                                                                                                                |          |          |                   |                 |
| 12                                                   | Using linear model for effect of CG-CrCL on CL                                                                 | 3628.224 | -245.454 | 11                | 6               |
| 13                                                   | Using piece-wise linear model for effect of CG-CrCL on CL                                                      | 3604.711 | -268.967 | 12                | 6               |
| 14                                                   | Using power model for effect of CG-CrCL on CL                                                                  | 3621.543 | -252.135 | 11                | 6               |
| 15                                                   | Using power model for effects of body weight on V1 and V2 (final CG-CrCL model)                                | 3516.484 | -88.227  | 14                | 13              |

-2.l.l.d.: -2 log likelihood difference. N<sub>parm</sub>: the number of estimable parameters.

**Supplemental Table S5** Summary of MIC to inhibit 50% and 90% of the strains for cefiderocol

| Species                                       | Number of strains | MIC <sub>50</sub><br>(µg/mL) | MIC <sub>90</sub><br>(µg/mL) | Reference |
|-----------------------------------------------|-------------------|------------------------------|------------------------------|-----------|
| <i>A. baumannii</i>                           | 104               | 0.125                        | 2                            | 6         |
| <i>P. aeruginosa</i>                          | 104               | ≤0.063                       | 1                            | 6         |
| β-lactamase-producing<br><i>A. baumannii</i>  | 29                | 0.5                          | 8                            | 6         |
| β-lactamase-producing<br><i>P. aeruginosa</i> | 33                | 0.5                          | 4                            | 6         |
| <i>Enterobacteriaceae</i>                     | 617               | ≤0.063                       | 0.5                          | 7         |

MIC<sub>50</sub> and MIC<sub>90</sub>: minimum inhibitory concentration to inhibit 50% and 90% of the strains, respectively.

**Supplemental Figure S1** VPC for the PK model developed for healthy subjects

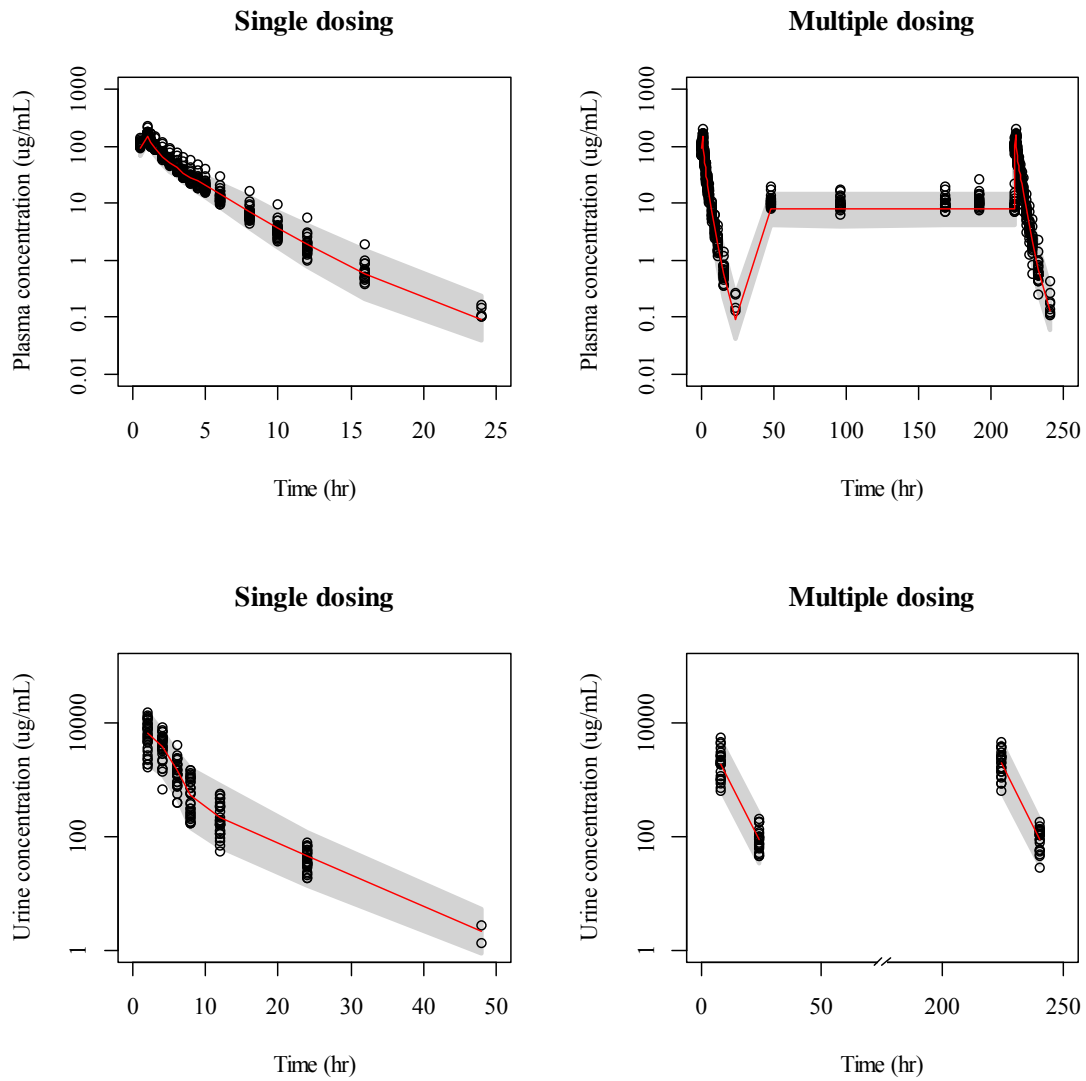

Semi-logarithmic y-axis. Upper figures: plasma data. Lower figures: urine data.



**Supplemental Figure S2** Relationships between MDRD-eGFR and CG-CrCL

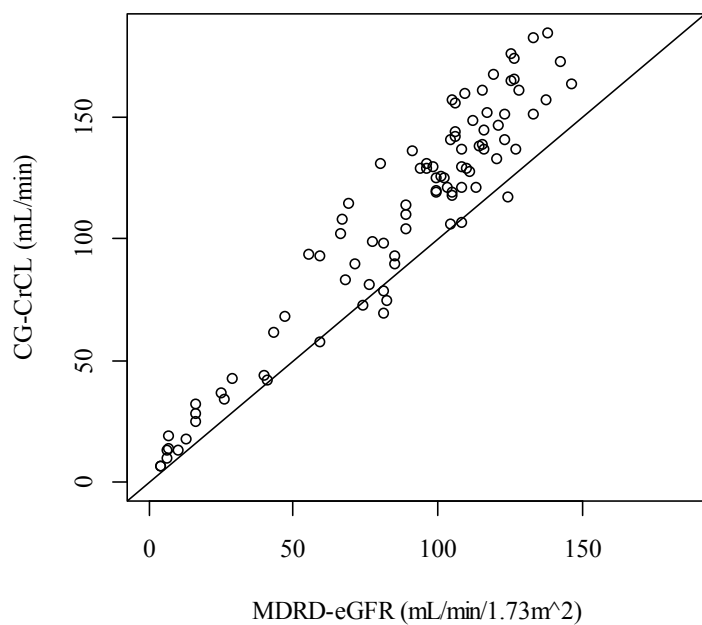

Solid line:  $y = x$ .

**Supplemental Figure S3** Goodness-of-fit plots for the covariate model with MDRD-eGFR.

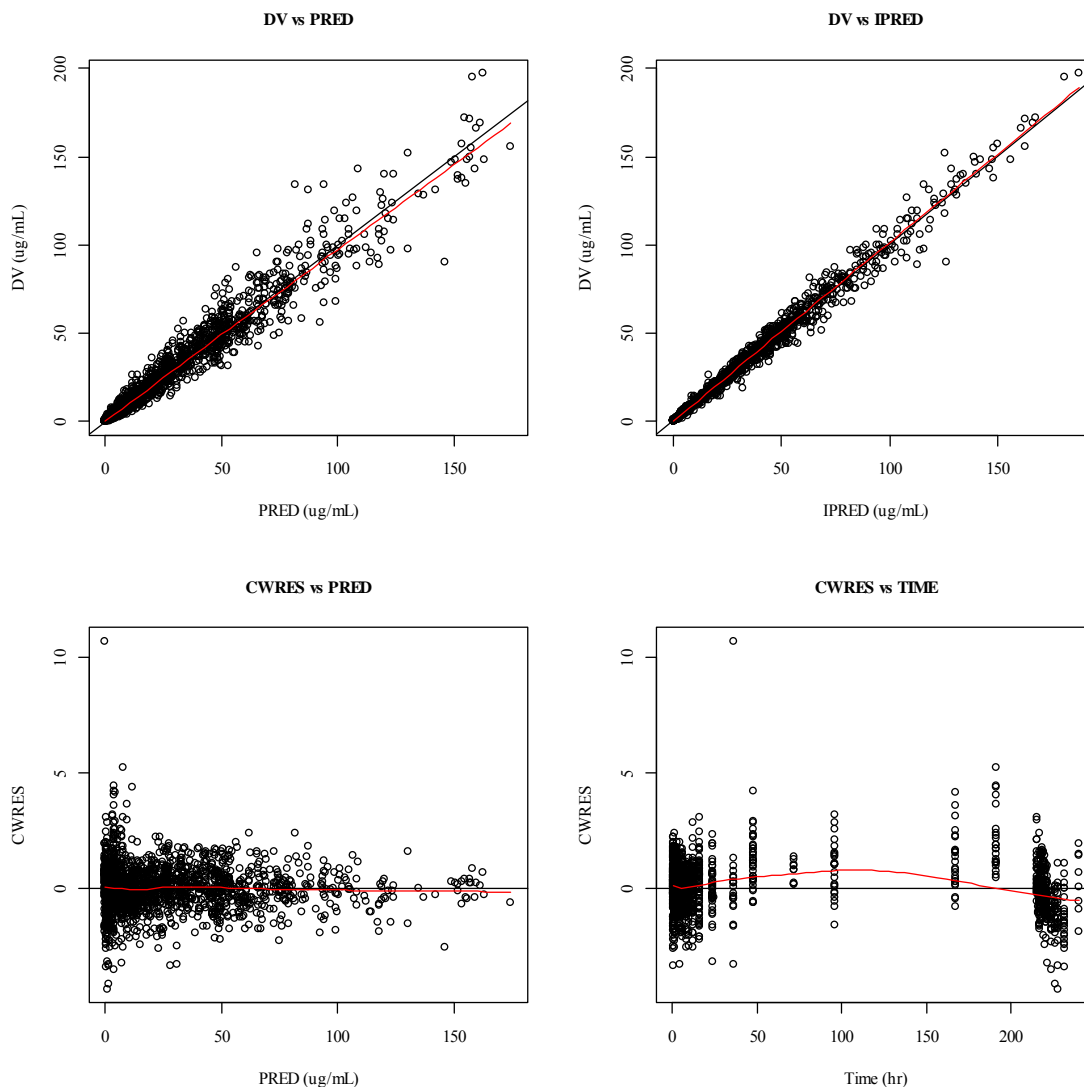

Black solid line:  $y = x$  in upper figures and  $y = 0$  in lower figures. Red solid line: LOESS smoother line. DV: Observed data. PRED: Population-predicted data. IPRED: Individual-predicted data. CWRES: Conditional weighted residuals.

**Supplemental Figure S4** Visual predictive check for the covariate model with MDRD-eGFR by renal function group.

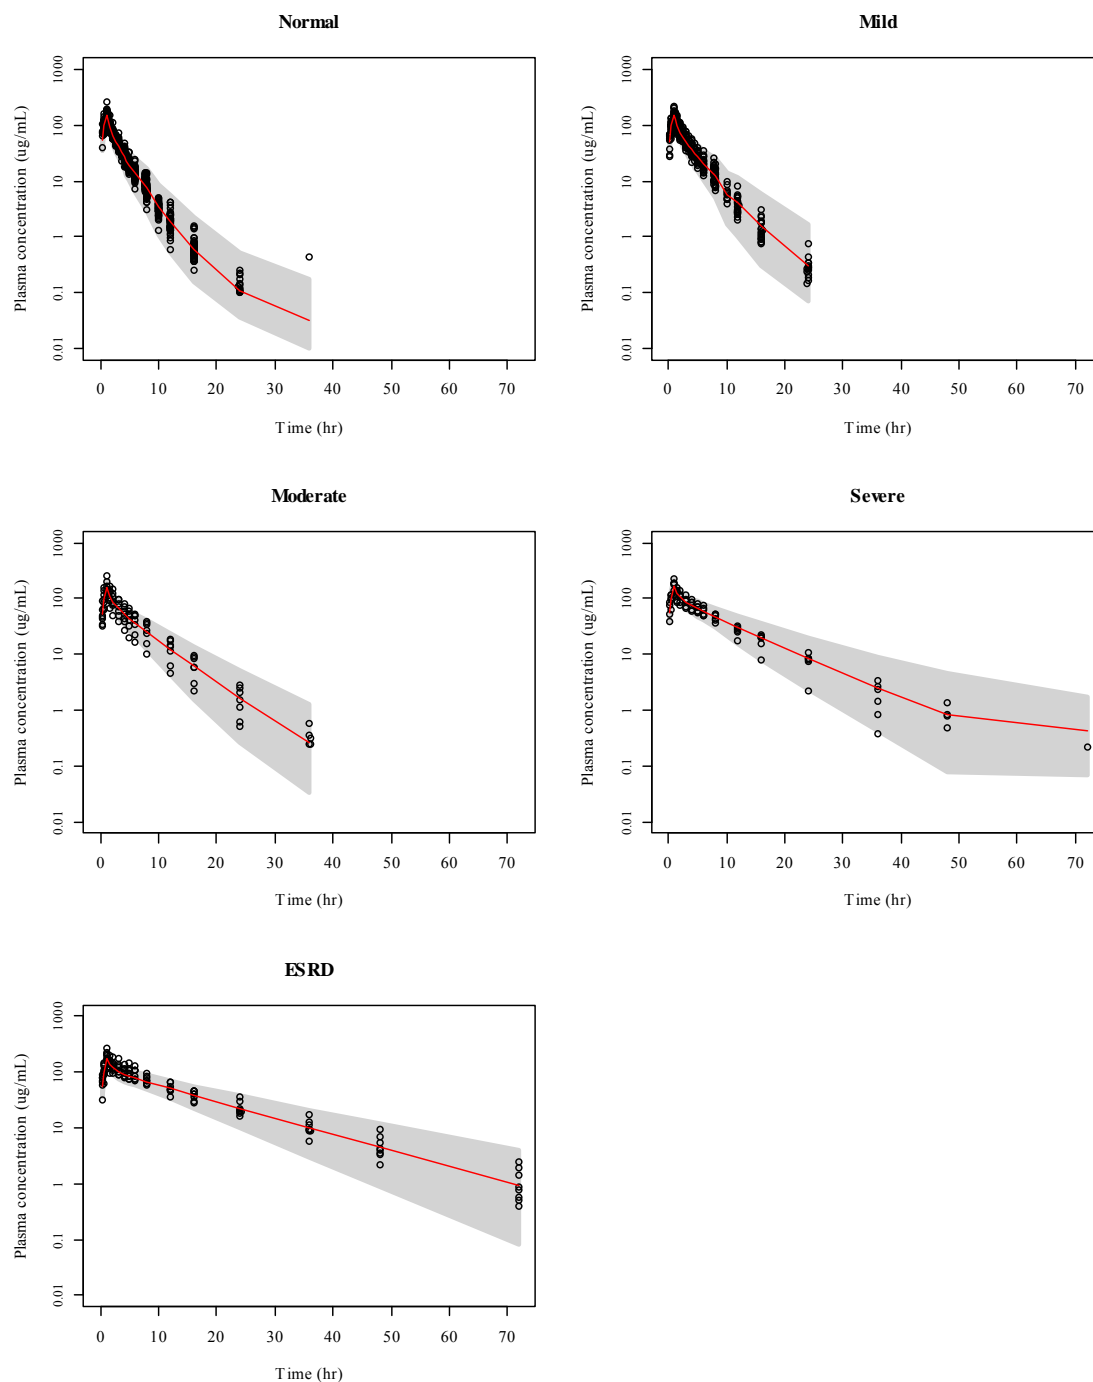

Red line: predicted median. Shaded area: 90% prediction interval. Time: time after the previous dose. Plasma concentration: 2-g dose-adjusted plasma concentration. Normal: MDRD-eGFR  $\geq 90$  mL/min/1.73 m<sup>2</sup>. Mild: MDRD-eGFR 60 to  $<90$  mL/min/1.73 m<sup>2</sup>. Moderate: MDRD-eGFR 30 to  $<60$  mL/min/1.73 m<sup>2</sup>. Severe: MDRD-eGFR 15 to  $<60$  mL/min/1.73 m<sup>2</sup>. ESRD: MDRD-eGFR  $<15$  mL/min/1.73 m<sup>2</sup>.

**Supplemental Figure S5** Visual predictive check for the covariate model with CG-CrCL in the range of high CG-CrCL

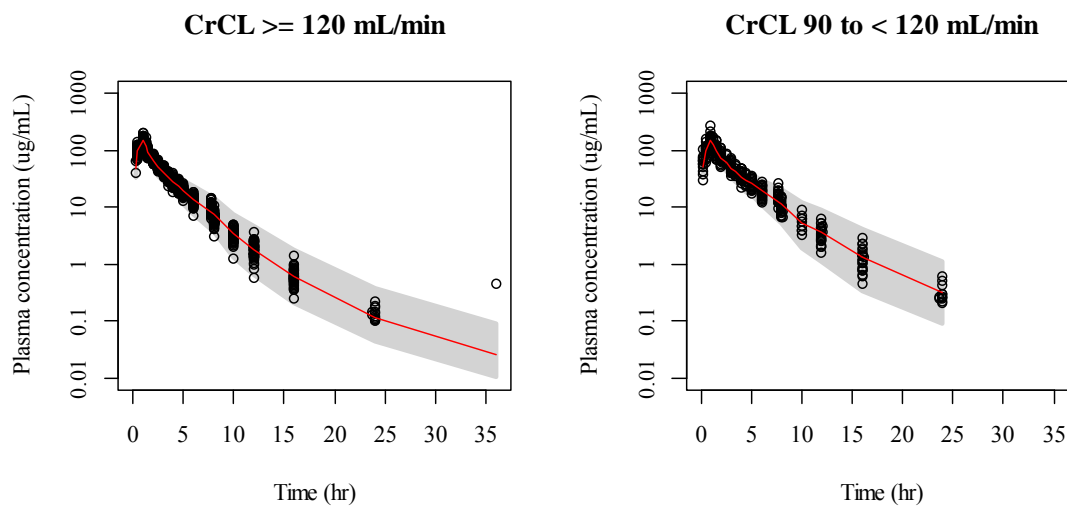

Red line: predicted median. Shaded area: 90% prediction interval. Time: time after the previous dose.  
Plasma concentration: 2-g dose-adjusted plasma concentration.

**Supplemental Figure S6** Individual predicted and observed plots of plasma cefiderocol concentration data with or without 3- to 4-hour HD for the HD model

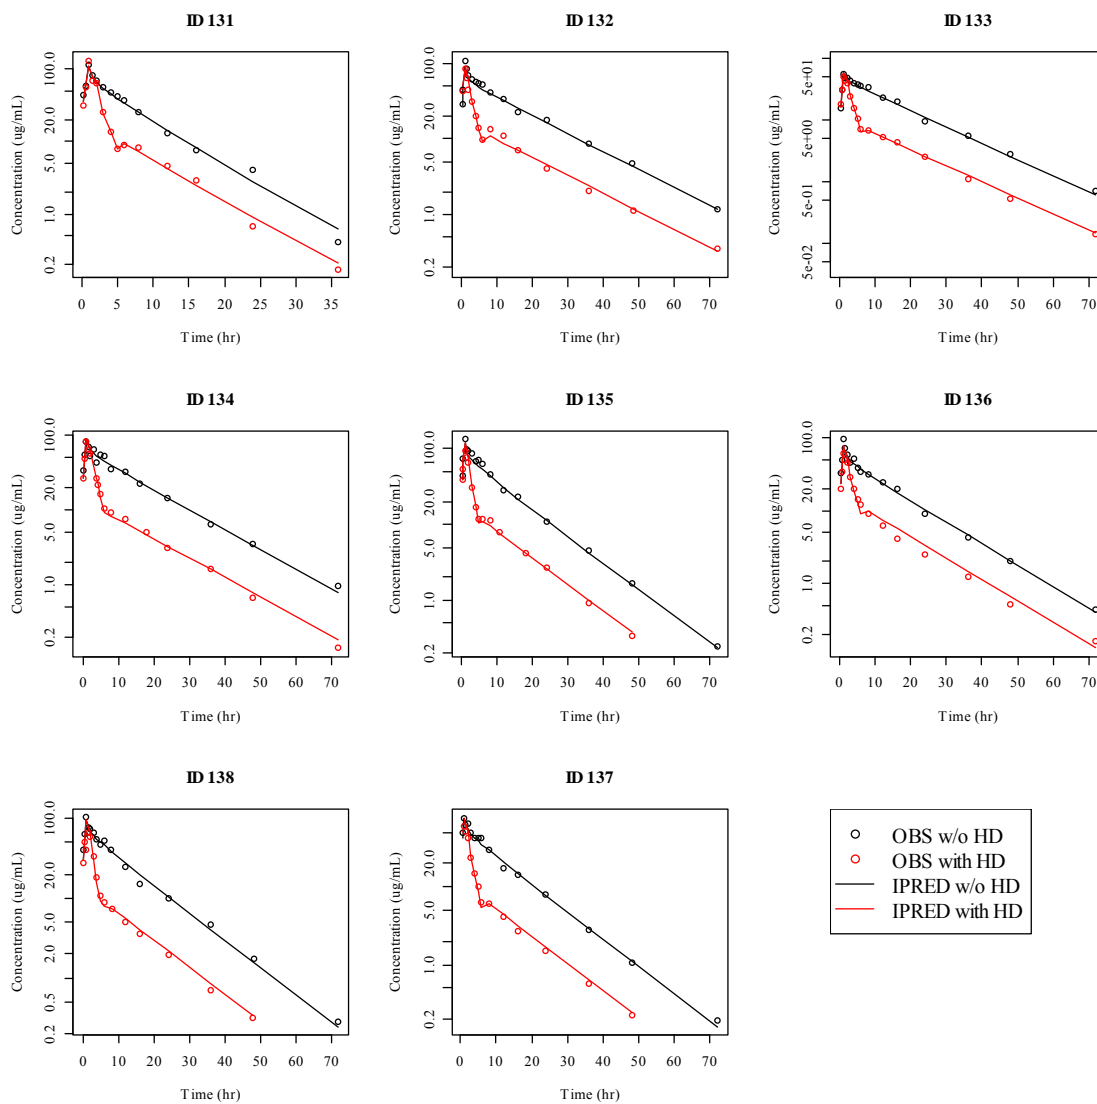

OBS: Observed data. IPRED: Individual-predicted data. W/o HD: Cefiderocol PK without non-dialysis period. With HD: Cefiderocol PK with dialysis period.

**Supplemental Figure S7** Individual predicted and observed plots of excretion ratios of cefiderocol in dialysate relative to dose for the HD model.

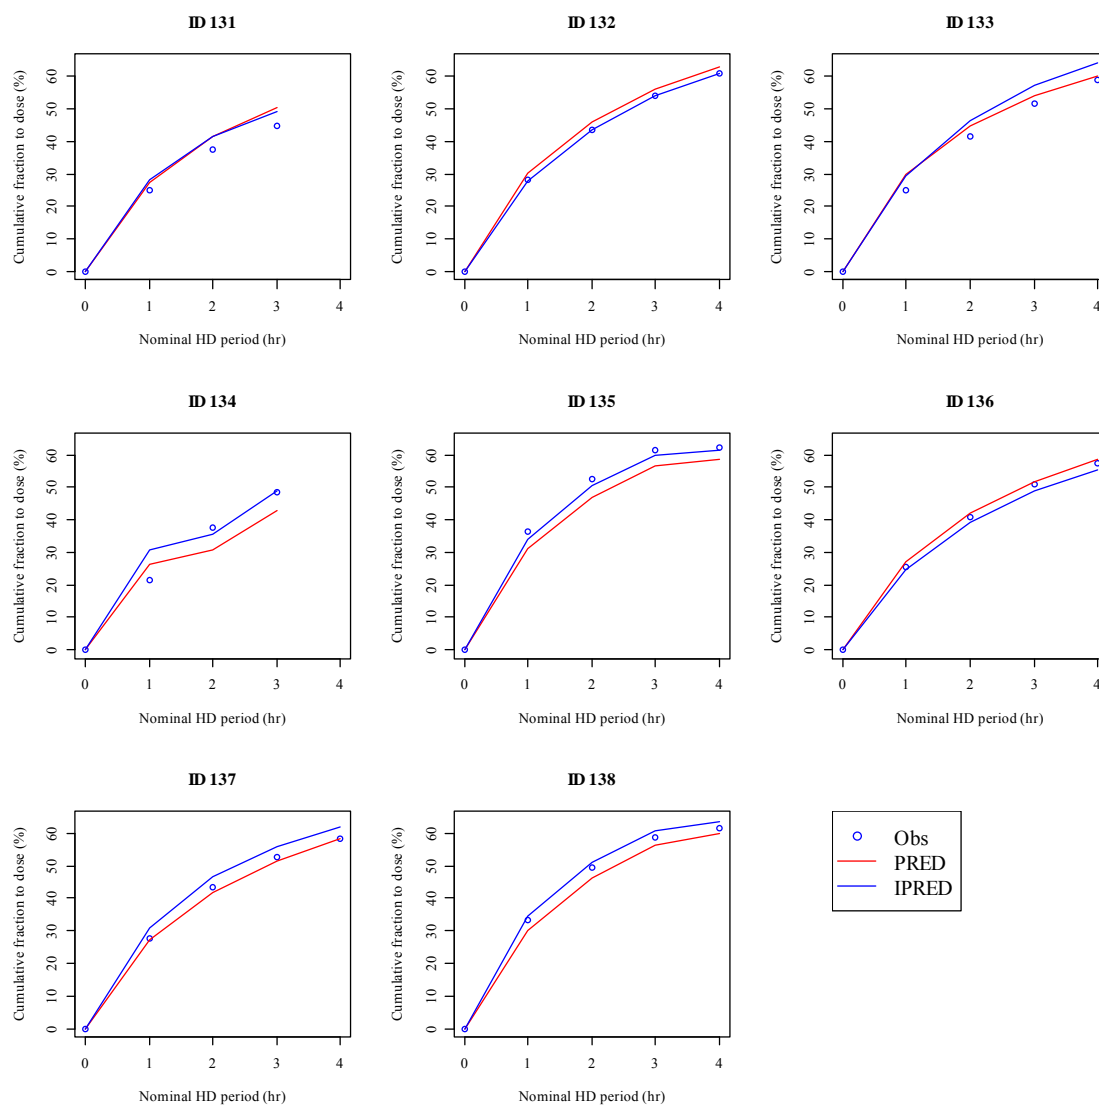

OBS: Observed data. PRED: Population-predicted data. IPRED: Individual-predicted data.

**Supplemental Figure S8** Simulated typical plasma cefiderocol concentration profiles in patients requiring intermittent HD following 0.75 g q12hr dose with or without a supplemental dose of 0.75 g.

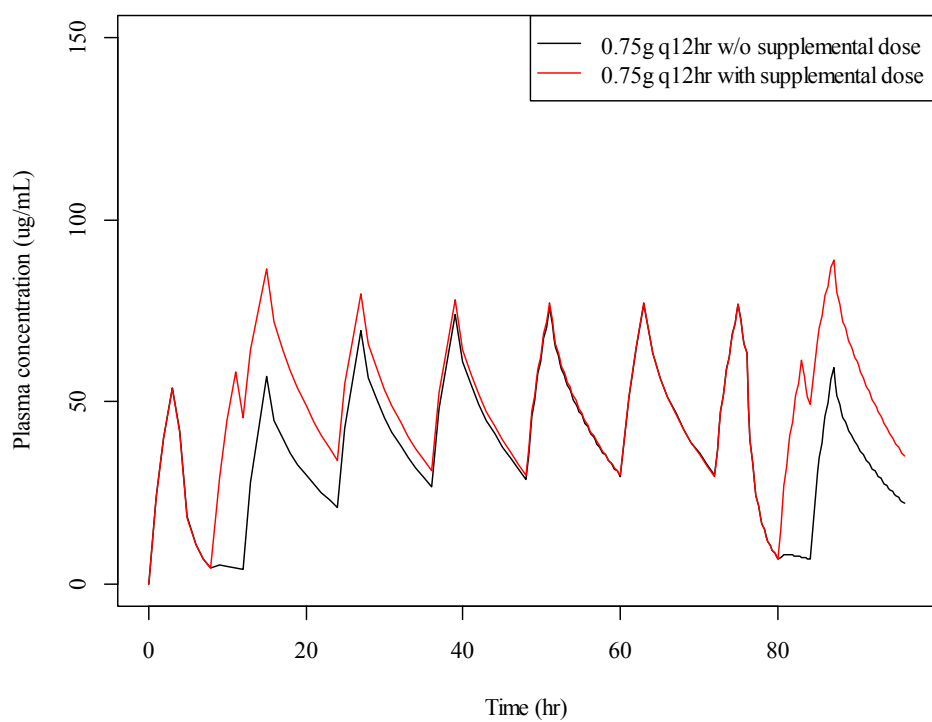

The 4-hr HD initiating at 1 hour after the end of 1<sup>st</sup> regular infusion was simulated on Days 1 and 4 assuming a three-times-a-week HD regimen.

The infusion time was 3 hours.

## REFERENCES

1. **Nakamura R, Toba S, Ito A, Tsuji M, Yamano Y, Shimada J.** 2014. Abstr 54th Intersci Conf Antimicrob Agents Chemother, abstr F-1559. A novel siderophore cephalosporin: V. Pharmacodynamic assessment in murine thigh infection models.
2. **Horiyama T, Toba S, Nakamura R, Tsuji M, Yamano Y, Shimada J.** 2014. Abstr 54th Intersci Conf Antimicrob Agents Chemother, abstr F-1560. A novel siderophore cephalosporin: VI. Magnitude of PK/PD parameter required for efficacy in murine lung infection model.
3. **Horiyama T, Toba S, Nakamura R, Tsuji M, Yamano Y, Shimada J.** 2014. Abstr 54th Intersci Conf Antimicrob Agents Chemother, abstr F-1561. A novel siderophore cephalosporin: VII. Magnitude of PK/PD parameter required for efficacy in murine thigh infection model.
4. **Shimada J, Saisho Y, Katsube T, White S, Fukase H.** 2014. Abstr 54th Intersci Conf Antimicrob Agents Chemother, abstr F-1564. S-649266, a Novel Siderophore Cephalosporin for Gram Negative Bacterial Infections: Pharmacokinetics, Safety and Tolerability in Healthy Subjects.
5. **Echols R, Katsube T, Arjona Ferreira JC, Krenz HK.** 2015. Abstr 25th European Congress of Clinical Microbiology and Infectious Diseases (ECCMID), abstr ECCMD-1174. S-649266, a Siderophore Cephalosporin for Gram Negative Bacterial Infection: Pharmacokinetics and Safety in Subjects with Renal Impairment.
6. **Ito A, Kohira N, Bouchillon SK, West J, Rittenhouse S, Sader HS, Rhomberg PR, Jones RN, Yoshizawa H, Nakamura R, Tsuji M, Yamano Y.** 2016. In vitro antimicrobial activity of S-649266, a catechol substituted siderophore cephalosporin, when tested against non-fermenting gram-negative bacteria. *J Antimicrob Chemother* **71**:670-677.
7. **Kohira N, West J, Ito A, Ito-Horiyama T, Nakamura R, Sato T, Rittenhouse S, Tsuji, M, Yamano Y.** 2015. In Vitro Antimicrobial Activity of a Siderophore Cephalosporin, S-649266, against Enterobacteriaceae Clinical Isolates, Including Carbapenem-Resistant Strains. *Antimicrob Agents Chemother* **60**:729-734.
